# 1 A long non-coding RNA controls parasite differentiation in

## 2 African trypanosomes

3  
4 **Authors:** Guegan F.<sup>1\*</sup>, Bento F.<sup>1,2</sup>, Neves D.<sup>1</sup>, Sequeira M.<sup>1</sup>, Notredame C.<sup>3,4</sup>, and  
5 Figueiredo L.M.<sup>1\*</sup>

6 \* Correspondence should be addressed to [gueganfabien@gmail.com](mailto:gueganfabien@gmail.com) and  
7 [lmf@medicina.ulisboa.pt](mailto:lmf@medicina.ulisboa.pt)

8 1. Instituto de Medicina Molecular – Joao Lobo Antunes, Faculdade de Medicina,  
9 Universidade de Lisboa, Portugal

10 2. Current address: Institute of Molecular Biology and Institute of Developmental Biology  
11 and Neurobiology, Johannes Gutenberg Universität, 55128 Mainz, Germany

12 3. Centre for Genomic Regulation (CRG), The Barcelona Institute of Science and  
13 Technology, Dr. Aiguader 88, Barcelona 08003, Spain

14 4. Universitat Pompeu Fabra (UPF), Barcelona, Spain

15  
16  
17 *Trypanosoma brucei* causes African sleeping sickness, a fatal human disease. Its differentiation  
18 from replicative slender form into quiescent stumpy form promotes host survival and parasite  
19 transmission. Long noncoding RNAs (lncRNAs) are known to regulate cell differentiation. To  
20 determine whether lncRNAs are involved in parasite differentiation we used RNAseq to survey  
21 the *T. brucei* lncRNA gene repertoire, identifying 1,428 previously uncharacterized lncRNA  
22 genes. We analysed *grumpy*, a lncRNA located immediately upstream of an RNA-binding  
23 protein that is a *key* differentiation regulator. Grumpy over-expression resulted in premature  
24 parasite differentiation into the quiescent stumpy form, and subsequent impairment of *in vivo*  
25 infection, decreasing parasite load in the mammalian host, and increasing host survival. Our

26 analyses suggest Grumpy is one of many lncRNA that modulate parasite-host interactions, and  
27 lncRNA roles in cell differentiation are probably commonplace in *T. brucei*.

28 **Keywords:**

29 *Trypanosoma brucei*, sleeping sickness, parasite, long non-coding RNAs, differentiation,  
30 stumpy forms.

31  
32

33 **Introduction**

34

35 When *T. brucei*, a unicellular kinetoplastid parasite, reaches a critical density in the  
36 mammalian blood, a quorum-sensing mechanism is activated and the parasites differentiate  
37 into quiescent, non-dividing stumpy forms (Vassella et al., 1997), limiting parasite population  
38 size and extending host survival. The stumpy form also facilitates transmission to the tsetse fly  
39 vector and development into insect procyclic forms (Silvester et al., 2017). In *T. brucei*,  
40 parasite density is sensed via the stumpy induction factor (SIF) (Vassella et al., 1997) and the  
41 SIF signaling pathway, which promotes gene expression, morphological, and metabolic  
42 changes associated with the stumpy form (Mony et al., 2014). To date, 43 genes have been  
43 identified to function in the SIF signaling pathway, ranging from signal transduction to signal  
44 response (Mony et al., 2014). RBP7 RNA-binding proteins (RBP7A and RBP7B) are effectors  
45 molecules of this pathway controlling downstream gene expression. RBP7A/B null mutant  
46 parasite become unresponsive to SIF signal and are unable to differentiate into stumpy forms.  
47 RBP7 genes are therefore key regulators of parasite differentiation, yet their mode of action  
48 and target genes are unknown (McDonald et al., 2018; Mony and Matthews, 2015).

49 In eukaryotes, lncRNA gene abundance is comparable to that of protein coding genes  
50 (Rinn and Chang, 2012). LncRNAs function in many cellular pathways (Carlevaro-Fita and  
51 Johnson, 2019; Geisler and Coller, 2013; Yao et al., 2019), including cell differentiation (Flynn  
52 and Chang, 2014; Ransohoff et al., 2018). LncRNAs can regulate cell fate choice by either

53 promoting or inhibiting differentiation. In skin stem cells, ANCR (anti-differentiation  
54 noncoding RNA) and TINCR (terminal differentiation noncoding RNA) lncRNAs function  
55 antagonistically. While ANCR suppresses epidermal differentiation pathway and maintains the  
56 stem cell compartment, TINCR promotes epidermal terminal differentiation (Kretz et al., 2013,  
57 2012). LncRNAs are also important players in parasite infections, regulating antigenic  
58 variation of *Plasmodium falciparum* (Amit-Avraham et al., 2015; Guizetti et al., 2016) and  
59 associated to the host cell response in *Toxoplasma gondii* infection (Menard et al., 2018).

60 To date, only 95 putative lncRNA genes have been annotated in *T. brucei*, all with  
61 unknown functions (Kolev et al., 2010). This small number, compared to 9598 *T. brucei* protein  
62 coding genes (Aslett et al., 2009), prompted us to analyze the non-coding repertoire of *T. brucei*  
63 and to determine if lncRNAs are regulators of parasite differentiation.

## 64 65 **Results and Discussion** 66

67 We used a combination of strand-specific and paired-end RNASeq, in-silico analysis,  
68 and database integration to re-annotate the lncRNA gene repertoire of *T. brucei* (Figure 1A -  
69 figure supplement 1-5). We identified 1,428 previously uncharacterized transcripts longer than  
70 200 nt, having no significant coding potential, few ribosomal interactions, and which do not  
71 encode any unique peptides (table supplement 1 and 2 - figure supplement 2-5). These putative  
72 lncRNAs are scattered throughout the 11 chromosomes of the *T. brucei* genome in a mostly  
73 intergenic fashion (figure supplement 6). They are shorter, less expressed, and less GC-rich  
74 than *T. brucei* protein coding mRNAs (figure supplement 7) but they otherwise harbor regular  
75 mRNA trans-splicing/polyadenylation motifs (figure supplement 8). We detected these  
76 transcripts either in the nucleus and/or the cytoplasm of various *T. brucei* life cycle stages  
77 (Figure 1B). In total, 25% of the lncRNA transcripts are differentially expressed between  
78 mammalian bloodstream and insect procyclic forms (figure supplement 9 - table supplement

79 3), compared to 16% of differentially expressed proteins coding transcripts. LncRNA gene  
80 repertoire in *T. brucei* is substantial (11% of total genes) and shows a high dynamic expression  
81 pattern during the parasite life cycle.

82 We analyzed an RNAi screen data output (Alsford et al., 2011) to test our hypothesis  
83 that lncRNAs are involved in parasite differentiation. We found a total of 399 lncRNA genes  
84 that appear to be required for differentiation to occur (Figure 1C - table supplement 4),  
85 consistent with our expectation that *T. brucei* lncRNA regulate parasite transition and  
86 adaptation between mammalian and insect vector hosts. LncRNAs have been reported to  
87 regulate cell differentiation by modulating expression of their neighboring genes (Flynn and  
88 Chang, 2014). We found 19 *T. brucei* lncRNAs genes located immediately upstream or  
89 downstream of 18 of the 43 SIF pathway genes (table supplement 5). The lncRNA Ksplice-  
90 3137a, which we named *grumpy* (for regulator of Growth and Stumpy formation), is located  
91 upstream of RBP7A and RBP7B, which are both required for SIF-induced stumpy formation  
92 (Mony et al., 2014). *grumpy*'s pattern of expression is similar to that of RBP7, which is  
93 transcribed both in the bloodstream and procyclic forms of *T. brucei* (Figure 2A). However,  
94 unlike RBP7 transcripts, *grumpy* does not interact with *T. brucei* ribosomes (Figure 2A) and  
95 does not produce detectable peptides (table supplement 2).

96 To further characterize the *grumpy* transcript, we used a circular RT-PCR (cRT-PCR)  
97 assay, in which *T. brucei* RNAs are circularized via their 5' – 3' end junctions, amplified and  
98 sequenced. We used gene-specific primers to confirm that *grumpy* is a trans-spliced and  
99 polyadenylated lncRNA transcript expressed as at least five different isoforms, including the  
100 smallest (359bp), the major (397 bp) and longest forms (432 bp) (Figure 2B). These findings  
101 are consistent with the Ksplice in-silico analysis, which revealed one splice-acceptor site and  
102 10 alternative polyadenylation sites for *grumpy* (Figure 2B). RT-qPCR showed that, while the  
103 mRNA levels of RB7B decrease during parasite differentiation from slender to stumpy forms,

104 *grumpy* levels remain constant (Figure 2C). However, an RNA-FISH analysis revealed changes  
105 in the subcellular localization of *grumpy* during stumpy formation (Figure 2D). Whereas in  
106 slender forms *grumpy* localizes in three distinct nuclear foci (one in the nucleolus and two in  
107 the nucleoplasm), in stumpy forms *grumpy* localizes in a single nucleolar focus (Figure 2D).  
108 Contrary to our initial hypothesis, these changes in subcellular localization suggest that *grumpy*  
109 may act through a trans-acting mechanism.

110 To identify the function of *grumpy*, we used a gain-of-function approach, in which  
111 *grumpy* was over-expressed 3-fold from an exogenous genomic location (mini-chromosome).  
112 These exogenous *grumpy* transcripts retained the original nucleolar localization and the  
113 transcript levels of RBP7A and B remained unchanged (Figure 3A and B). We observed that  
114 exogenous expression of *grumpy* repressed *T. brucei* growth and increased lifespan *in vitro*  
115 (Figure 3C and D). We asked whether this reduction in parasite growth could be explained by  
116 a higher proportion of the stumpy forms in culture. Stumpy formation occurs only at high  
117 parasite density via the SIF-dependent quorum-sensing mechanism, and can be quantified  
118 using flow cytometry (Batram et al., 2014; Dean et al., 2009) by measuring the fraction of  
119 transgenic parasite expressing the fluorescent stumpy marker GFP::*PAD1*. After 2 days in  
120 culture, 60% of the *grumpy* over-expressing parasites with were in the stumpy form, compared  
121 to 7% in the parental line cultured for the same time period (Figure 3E). *Grumpy* over-  
122 expression also lead to a lower parasite density ( $<0.7 \times 10^6$  cells/ml) compared to the parental  
123 culture ( $1.4 \times 10^6$  cells/ml) (Figure 3C). Parasites over-expressing *grumpy* displayed all  
124 hallmarks of being in stumpy form, including *PAD1* protein expression at the cell surface  
125 (Figure 3F), arrest at the cell cycle G0/G1 phase (Figure 3G), and pre-adaptation to differentiate  
126 into the insect procyclic stage (Figure 3H).

127 To confirm these results *in-vivo*, we induced mouse infections with parasites over-  
128 expressing *grumpy* and measured parasitemia, mouse survival, and stumpy formation, which

129 were compared to infection by the parasite parental line. Mice infected with the parental cell  
130 line showed a typical infection profile characterized by successive waves of parasitemia  
131 (Figure 4A) and an average survival of 43 days (Figure 4B) (Trindade et al., 2016). By contrast,  
132 mice infected with parasites over-expressing *grumpy* showed no detectable parasitemia and did  
133 not die from the infection (>100days) (Figure 4A and B). When *grumpy* over-expression was  
134 induced four days post-infection, the parasites succeeded in establishing an infection (Figure  
135 4A), with three mice out of four dying from the infection and mice survival time increasing  
136 from approximately 43 to 72 days (Figure 4B). Thus, *grumpy* over-expression substantially  
137 reduces parasite virulence in mice.

138 Our *in vivo* analysis also recapitulated *in vitro* observations with respect to stumpy  
139 forms and density. Wild-type parasites started differentiating into stumpy forms (>20% stumpy  
140 forms in the blood) only at high parasitemia ( $>1.5 \times 10^7$  parasites/ml) whereas *grumpy*-over-  
141 expressing parasites differentiated into stumpy forms when parasitemia was as low as  $1.1 \times 10^6$   
142 parasites/ml (Figure 4C). These results support the notion that *grumpy* over-expression triggers  
143 premature *T. brucei* differentiation into stumpy forms, which is associated with a reduction in  
144 parasite virulence.

145 Here, we show that the *grumpy* lncRNA is a regulator of parasite differentiation in *T.*  
146 *brucei*. Its mechanism of action, currently unknown, does not correlate to RBP7 expression but  
147 likely involves its nucleolar localization. This localization is seen for the mammal X  
148 inactivation factor, Xist, and pRNA, a promoter-associated RNA that drives mouse embryonic  
149 stem cell differentiation (Savić et al., 2014; Zhang et al., 2007). Both of these lncRNAs  
150 promote heterochromatin formation at the nucleolar periphery. Other lncRNAs bind and  
151 sequester specific proteins in the nucleolus, rendering them functionally inert (Audas et al.,  
152 2012). *Grumpy* could regulate stumpy formation through similar mechanisms either by  
153 sequestering stumpy regulator proteins (or its mRNAs) or by modulating the genomic

154 conformation of stumpy regulator genes within the nucleolus. In the future, it will also be  
155 important to evaluate if grumpy is necessary for stumpy formation. This will require careful  
156 genome editing given that part of the grumpy lncRNA shares sequence homology with RBP7A  
157 3'UTR.

158  
159 Of the 1,428 lncRNA genes we have identified in *T. brucei*, 649 have been predicted,  
160 via an RNAi screen, to play a role in parasite fitness, including 399 lncRNA genes involved in  
161 cell differentiation (Figure 1C). That 18 of the 41 genes involved in the quorum-sensing  
162 signaling pathway have a lncRNA gene in close proximity suggests that *grumpy*'s role in  
163 differentiation may be only one instance of a more general process used by the parasite to sense  
164 its environment and modulate its virulence accordingly. Understanding these regulatory  
165 processes may open up possibilities for developing therapeutic strategies to treat sleepiness  
166 sickness.

167

## 168 Materials and Methods

169

### 170 **Ethics statement**

171 Male C57BL/6J (6–8 weeks old) were purchased from Charles River Laboratories (Lyon,  
172 France). All animal care and experimental procedures were performed according to EU  
173 regulations (Directive 2010/63/EU9) and approved by the Animal Ethics Committee of  
174 Instituto de Medicina Molecular João Lobo Antunes (AWB2016\_19FG\_RNA).

175

### 176 ***T. brucei* cell culture**

177 A stumpy reporter cell line with a GFP:PAD1UTR construct (Batram et al., 2014) integrated  
178 into the tubulin locus was generated in *T. brucei* Antat1.1e (90:13) strain (Engstler and Boshart,

179 2004). The stumpy reporter cell line was selected for its most intense GFP expression, which  
180 occurs in the nucleus in response to quorum-sensing signal. This reporter cell line was used as  
181 the genetic background to overexpress for Grumpy-lncRNA. It was cultivated in HMI-11 at  
182 37°C in 5% CO<sub>2</sub> with 2,5 µg/mL G418, 5 µg/mL Hygromycin B, 5 µg/mL Blasticidin S and  
183 2,5 µg/mL Phleomycin.

184

### 185 **Grumpy-lncRNA expression construct**

186 The non-coding sequence of Grumpy lncRNA was amplified from *T. brucei* Antat 1.1E  
187 genomic DNA with forward (5'-CAAAAGGACAGAATTATAGGTTCA-3') and reverse (5'-  
188 GATGCAGCTCAACAGCAAG-3') primers and inserted into pDEX577 (phleo) between the  
189 Hind III and BamH I sites of the plasmid. pDEX577 vectors are highly-modular expression  
190 vectors for inducible expression of transgenes, integrating in the minichromosome repeats,  
191 which was designed and constructed by Steve Kelly (Kelly et al., 2007). Moreover, two T7  
192 terminator sequences were inserted between the BamH I and Kpn I sites of the plasmid just  
193 downstream to the Grumpy lncRNA construct. The construct was linearized with Not I prior  
194 to transfection. Stable transfectant clones were obtained by serial dilution of the transfected  
195 population and selected after 6-7 days after transfections. Inducible expression is obtained by  
196 adding Tetracycline (in vitro) or Doxycycline (in vivo) at the following concentrations: 1  
197 µg/mL and 1 mg/ml.

198

### 199 **Inducible expression of Grumpy-lncRNA**

200 Cells were diluted at 5x10<sup>4</sup> parasites/mL and induced with 1 µg/mL of tetracycline for 6 days.  
201 Cells were counted every day, live/dead cells were assessed by Propidium iodide staining,  
202 GFP::PAD1 positive cells were scored and all these parameters quantified using Accuri C6  
203 flow cytometry. At day 2 after tetracycline induction, RNA samples were collected by



204 centrifugation of equivalent number of cells and addition of TRIzol reagent (Invitrogen) to the  
205 cell pellets. At day 3 after tetracycline induction, an equivalent number of cells were collected  
206 by centrifugation and the cell-cycle profiles were assessed using Accuri C6 flow cytometer and  
207 Propidium iodide staining in fixed cells.

208

### 209 **Quantitative RT-PCR**

210 RNA was prepared with TRIzol reagent (Invitrogen) according to manufacturer's instructions  
211 and cDNA was synthesized with random primers and SuperScript II reverse transcriptase.  
212 Quantitative PCR was performed with AmpliTaq Gold™ DNA Polymerase (Power SYBR  
213 Green Master Mix, Applied Biosystems™) and gene-specific primers:

214 Control of Differentiation (Tb927.10.12970)

215 FW: CCAGCCTTCTCAATCTCCAG

216 Rv: GGCCACAGTTGGATAGCTTG

217 Tb927.10.12080

218 FW: CCTGCAGGCGTCACATTC

219 RV: CAGTGAAGAAGAAAAGGCACG

220 Grumpy lncRNA:

221 FW: AACGGAAGGAAAGTTTGTGAATGC

222 Rv: GTGAATGAACTTTTTGTTTGGCGTC

223 RBP7A:

224 FW: GCTCGACTTTTTGTTGGGCAG

225 RV: CATATTGTAGCGGTTGTGAAGCG

226 RBP7B:

227 FW: CTTAACGCAACCGAAGATG

228 RV: CAACGGTTGTGAAGTCCG

229 The quantitative PCR program was:

230 Stage 1 - 10 min at 95°C

231 Stage 2 - 15 sec at 95°C, 15 sec at 60°C, 30 sec at 72°C (40 cycles)

232 Melt curve - 15 sec at 95°C, 1 min 10 sec at 60°C, 15 sec at 95°C

233

### 234 **Stumpy formation assay**

235 Cell cultures were started at  $5 \times 10^4$  parasite/mL and induced or not with 1 µg/mL of tetracycline.

236 Every day of culture, sufficient number of cells (>10 000 parasites) were collected, washed

237 with trypanosome dilution buffer (TDB) (5 mM KCl, 80 mM NaCl, 1 mM MgSO<sub>4</sub>, 20 mM

238 Na<sub>2</sub>HPO<sub>4</sub>, 2 mM NaH<sub>2</sub>PO<sub>4</sub>, 20 mM glucose, pH 7.4), and resuspended in 200 µL of TDB

239 with 1 µg/mL Propidium iodide. A fixed volume of each cell culture was analysed by flow

240 cytometry (Accuri C6) to simultaneously measure the parasites density, live and dead parasites

241 and the GFP::PAD1 expression.

242

### 243 **Cell cycle profile assay**

244 Cell cultures were started at  $5 \times 10^4$  parasite/mL and induced or not with 1 µg/mL of tetracycline.

245 After 3 and 4 days of *in vitro* culture,  $2 \times 10^6$  parasites were collected and spun down (10 min,

246 1300g, 4°C), washed once with ice-cold PBS, resuspended in 1 ml PBS/2 mM EDTA and fixed

247 by adding drop wise 2.5 ml ice cold 100% ethanol (store EtOH at -20°C). Cells were fixed at

248 4°C for at least one hour, washed once with 1 ml PBS/EDTA at RT and resuspended in 1 ml

249 PBS/EDTA. RNA was digested by adding 1 µl RNaseA (10 µg/µl) and DNA stained by adding

250 1 µl propidiumiodide (1mg/µl) during 30 min at 37°C. Cell-cycle profile were analysed by

251 flow cytometry using Accuri C6 machine with FL3 channel.

252

### 253 **Parasite differentiation into procyclic assay**

254 Cell cultures of bloodstream forms were started at  $5 \times 10^4$  parasite/mL and Grumpy IncRNA  
255 was induced or not with 1  $\mu$ g/mL of tetracycline. After 2 days of *in vitro* culture, the number  
256 of stumpy forms were assessed by measuring the GFP::PAD1 expression using flow cytometry  
257 (Accuri C6). Bloodstream forms culture were collected, spun down, resuspended in  
258 Differentiation Trypanosome Medium (DTM) with 6mM cis-Aconitate at  $1 \times 10^6$  parasites/mL  
259 and incubated at 27°C. Parasite differentiation into procyclic forms was assessed at 12h post  
260 differentiation by Flow cytometry using anti- *Trypanosoma brucei* procyclin antibody (Clone  
261 TBRP1/247, CLP001AP, 0.5mg, Cedarlane) conjugated with Alexa Fluor 647 (Protein  
262 labelling kit, Molecular probes) (1/500 dilution in TDB).

263

#### 264 **Infections and Sample Collection**

265 Four weeks old male c57BL/6 mice (Charles River, France) were inoculated intraperitoneally  
266 with 2000 parasites. Mice were infected with either Antat1.1 90:13 GFP::PAD1 cell line or  
267 Antat1.1 90:13 GFP::PAD1 Grumpy-overexpression cell line. Mice infected with Antat1.1  
268 90:13 GFP::PAD1 Grumpy-overexpression parasites were separated in three different cages,  
269 one cage of 4 mice received only water, one cage of 4 mice received water with 1 mg/ml  
270 doxycycline hyclate (Sigma-Aldrich) at day 4 post infection, one cage of 3 mice received water  
271 with 1 mg/ml doxycycline hyclate at the day of infection. Parasitaemia was monitored by tail-  
272 vein bleeds every other day and counted using a Hemocytometer with 1:150 blood dilution in  
273 TDB. The percentage of stumpy forms in the mice blood were assessed by measuring  
274 GFP::PAD1 expression in blood diluted sample using Accuri C6 flow cytometer. Mice survival  
275 were monitored every other day until 100 days post infections. Mice were euthanized at the  
276 first signs of severe disease distress, with all efforts to minimize animal suffering.

277

#### 278 **RNA-FISH**

279 Between  $2,5 \times 10^5$  to  $1 \times 10^6$  cells were harvested by centrifugation (10 min, 1800 g), washed  
280 with 1X PBS or TDB and resuspended in between 500  $\mu$ L and 1 mL of fixation buffer (3,7%  
281 Formaldehyde diluted in RNase-free PBS) for 10 min at room temperature. Fixed cells were  
282 washed with between 500  $\mu$ L and 1 mL of RNase-free PBS and resuspended with 150  $\mu$ L of  
283 RNase-free PBS. Cells were then settled on pre-coated polylysine culture dishes (35mm glass  
284 bottom, MatTEK) for at least 20 min. PBS was removed and cells were permeabilized with 1  
285 mL of ethanol 70% (in RNase free water) for at least 1 hour at +2 to +8 °C. Ethanol 70% is  
286 discarded and cells washed with 200  $\mu$ L wash buffer A (10% vol./vol. formamide in 1X Wash  
287 Buffer A, Biosearch Technologies Cat# SMF-WA1-60). Cells were incubated with 100  $\mu$ L  
288 Hybridization buffer containing 1,25  $\mu$ M of RNA-FISH probes in the dark at 37 °C overnight  
289 (~16 hours). Cells were washed with 200  $\mu$ L of wash buffer A and incubated 200  $\mu$ L of wash  
290 buffer A in the dark at 37 °C for 30 minutes. Cells were stained with a solution of 1  $\mu$ g/mL of  
291 DAPI (in wash buffer A) in the dark at 37 °C for 30 minutes. Cells were washed with 200  $\mu$ L  
292 of wash buffer B (Biosearch Technologies Cat# SMF-WB1-20) and incubated with it at room  
293 temperature for 2-5 minutes. 100  $\mu$ L Vectashield was added to the dishes prior analysis with  
294 the Zeiss cell observer wild Field microscope.

295 RNA-FISH probes were designed using the online tools provide by LGC Biosearch  
296 Technologies (Stellaris Probe Designer, [https://www.biosearchtech.com/support/tools/design-](https://www.biosearchtech.com/support/tools/design-software/stellaris-probe-designer)  
297 [software/stellaris-probe-designer](https://www.biosearchtech.com/support/tools/design-software/stellaris-probe-designer)). 17 probes were designed for Grumpy lncRNA, and 30-43  
298 probes for Ksplice lncRNA223a, lncRNA1077a, lncRNA1735a and lncRNA5090a.

299

### 300 **PAD1 staining**

301  $5 \times 10^5$  bloodstream form parasites were harvested by centrifugation (10 min, 1800 g), washed  
302 with 1X PBS and resuspended in 500  $\mu$ L of fixation buffer (4% paraformaldehyde diluted in  
303 1X PBS) for 10 min at room temperature. Fixed cells were washed with 500  $\mu$ L 1X PBS and

304 resuspended with 100  $\mu$ L of 1X PBS. Cells were then settled on pre-coated polylysine culture  
305 dishes (35mm glass bottom, MatTEK) for at least 20 min. PBS was removed and cells were  
306 permeabilized with 100  $\mu$ L of 0,1% Triton in PBS for 2 min at room temperature.  
307 Permeabilized cells are washed 5 times with 200  $\mu$ L of PBS and blocked with 2% BSA in PBS  
308 for 45 min at 37°C in a humidity chamber. Cells were incubated with 100  $\mu$ L of the primary  
309 antibody anti-PAD1 (1/1000 in 2% BSA in PBS, antibody provided by Keith Matthews)  
310 overnight at 4°C in a humidity chamber. Cells are washed 5 times with 200  $\mu$ L of PBS and  
311 incubated with 100  $\mu$ L of the secondary antibody anti-rabbit (1/1000 in 2% BSA in PBS, Goat  
312 anti-Rabbit Alexa Fluor 647 #A21245 – Invitrogen) for 45 min at 4°C in a humidity chamber.  
313 Parasite DNA was stained using 100  $\mu$ L DAPI or Hoechst solution (1  $\mu$ g/ml) for 20 min at  
314 room temperature. Cells were washed 5 times with 200  $\mu$ L of PBS and 100  $\mu$ L Vectashield  
315 was added to the dishes prior analysis with the Zeiss cell observer wild Field microscope.

316

### 317 **Transcript quantification and Circular RT-PCR**

318 Transcript quantification was performed by quantitative RT-PCR, as described in Aresta-  
319 Branco *et al.* (Aresta-Branco et al., 2015) except that random hexamer primers were used to  
320 generate cDNA.

321 Circular RT-PCR protocol was performed essentially as described in Laboratory Methods in  
322 Enzymology book (ABELSON and SIMON, 2009). Briefly, parasites were harvested by  
323 centrifugation 677 g for 10 min at 4°C and immediately resuspended in TRIzol (life  
324 technologies). Total RNA is isolated following the manufacturer's instructions and RNA was  
325 quantified in a NanoDrop 2000 (Thermo Fisher Scientific). The ideal RNA concentration to  
326 perform the circular RT-PCR protocol is 0.5–1 mg/ $\mu$ l. RNA cap and poly A tail were removed  
327 by oligonucleotide-directed RNase H cleavage using Spliced-leader and oligo dT primers.  
328 After RNase H treatment, RNA was extracted with phenol/chloroform approach and

329 precipitated using ethanol precipitation protocol. 3-5 µg of RNase H treated RNA was  
330 circularized using T4 RNA ligase 1 (ssRNA Ligase, New England Biolabs), RNA was  
331 extracted with phenol/chloroform approach and ethanol precipitated. RNA was reverse  
332 transcribed using gene-specific primer R1 (100 nucleotides from the 5' end of the transcript or  
333 the RNase H cleavage site) and reverse transcriptase, RT buffer and 5mM Magnesium from  
334 Superscript II kit (life technologies). The resulting cDNA molecules contain the juxtaposed 5'  
335 and 3' ends of circular RNA. PCR is performed on the produced cDNA using gene-specific  
336 primers R2 and forward F1. R2 primer is in "nested" position compared to R1 primer and  
337 contributes to the specificity of PCR amplicon. PCR#1 product was purified using Minielute  
338 PCR purification kit (Qiagen) and a second round of PCR amplification was performed with  
339 gene-specific primers R2 and forward F2. F2 primer is in nested position compared to F1  
340 primer position and contributes to PCR amplicon specificity. PCR#2 product was ligated to  
341 pGEM-T easy vector or TOPO vector following the manufacturer's instructions (Promega).  
342 After transformation in bacteria and plasmid amplification, the subcloned PCR#2 fragments  
343 were amplified and sequenced using T7 and SP6 primers.

344

345

### 346 **RNA-Sequencing**

347 *T. brucei* bloodstream-form (BSF) and procyclic-form (PF) parasites (strain Lister 427,  
348 antigenic type MiTat 1.2, clone 221a), from PL1S cell line (Yang et al., 2009), were used to  
349 generate strand-specific libraries following the manufacture instructions (Encore® Complete  
350 RNA-Seq Library Systems, NuGen) for Illumina next-generation paired-end sequencing.  
351 RNA-sequencing were performed Genomics Core Facility, EMBL Heidelberg. The sequence  
352 data from this study have been submitted to the NCBI Sequence Read Archive – SRA.....

353

## 354 **Reconstruction of *T. brucei* transcriptome**

355 In *T. brucei*, all mature mRNAs are trans-spliced and polyadenylated which means that all  
356 mRNA transcripts start with a conserved spliced-leader sequence and finish with poly(A) tail  
357 sequence<sup>31</sup>. We hypothesized that any new *T. brucei* transcripts including noncoding RNA  
358 transcripts will bear these features. RNA-seq reads were assessed for quality using FastQC. In  
359 order to improve genome mappability, RNA-seq reads size were increased, if possible, by  
360 merging the paired-end reads using PEAR software - Paired-End reAd mergeR ([https://cme.h-](https://cme.h-its.org/exelixis/web/software/pear/)  
361 [its.org/exelixis/web/software/pear/](https://cme.h-its.org/exelixis/web/software/pear/)). Merged and forward unmerged reads containing a  
362 minimum of 8 bp matching the SL sequence on their 5' end were extracted for 5' splice-  
363 acceptor site detection and the SL sequenced removed from the read. Reads containing  
364 stretches of at least 9 A's in the merged reads, or 9 T's in the unmerged reverse reads were  
365 extracted for poly-A site identification and and the poly-A tails removed from the read.  
366 SL and polyA reads were aligned to *T. brucei* genome (<https://tritrypdb.org/tritrypdb/> ; genome  
367 annotation: version v5.1) using LAST (version 959) alignment tools (Kielbasa et al., 2011)  
368 ([http //last.cbrc.jp/](http://last.cbrc.jp/)). 5' splice-acceptor sites were determined by the first position of all SL-  
369 containing reads mapping uniquely to the genome. Poly-A sites were determined by the last  
370 position of all uniquely mapped poly-a containing reads. SL acceptor or polyA sites were  
371 considered for further analysis if a splice-acceptor or polyA site is supported by at least 5 reads.  
372 Putative *T. brucei* genes were defined by all genomic regions separated by at least one 5'  
373 acceptor site and one 3' poly-A site occurring before the next downstream 5' site. For each  
374 gene region, the longest transcript isoform was defined by the association of the most upstream  
375 SL-acceptor site and the most downstream polyA site. In contrary, the major isoform of *T.*  
376 *brucei* gene transcript was defined by the gene region bordered by the major SL acceptor and  
377 polyA sites (*i.e.* ones with most reads aligned). This analysis identified 8,831 genes in *T. brucei*  
378 genome

379

## 380 **Identification of Ksplice putative new noncoding genes**

381 A stringent selection pipeline was developed to systematically identify *T. brucei* non-coding  
382 RNAs. This pipeline aims to discard housekeeping (tRNAs, snRNAs, snoRNAs) *T. brucei* non-  
383 coding RNAs and transcripts with protein-coding potential. First, only transcripts that do not  
384 overlapped annotated protein-coding and non-coding RNA genes from Tritryp data  
385 (<https://tritrypdb.org/tritrypdb/> ; genome annotation: version v5.1) were retained. Second, *T.*  
386 *brucei* transcripts with protein-coding potential were excluded. Protein-coding potential was  
387 determined by using three different approaches. 1) The protein-coding potential for each  
388 transcript was calculated using coding potential calculator score (CPC2) (Kang et al., 2017).  
389 2) The association with *T. brucei* ribosomes and translation efficacy of each transcript was  
390 measured using the published ribosome profiling data from *T. brucei* (Vasquez et al., 2014)  
391 and re-analysing it with our Ksplice gene annotation. 3) The non-coding potential of each  
392 transcript were confirmed using Proteomics data from three different lifecycle stage of *T.*  
393 *brucei* (Dejung et al., 2016). Each transcript with non-coding potential defined in part 1) and  
394 2) and not encoding any peptides or encoding solely non-unique peptides in part 3) were  
395 classified a Ksplice noncoding RNA genes.

396

### 397 **(1) Coding potential calculator (CPC2)**

398 The longest isoform of each Ksplice genes were used for CPC2 analysis. CPC2 (Kang et al.,  
399 2017) discriminates coding and non-coding DNA sequences based on four intrinsic features:  
400 Fickett TETSCODE score, open reading frame (ORF) length, ORF integrity and isoelectric  
401 point (pI). The Fickett TESTCODE score was calculated from the weighted nucleotide  
402 frequency of the full-length transcript whereas the ORF length, ORF integrity and pI were  
403 calculated from the longest putative ORF identified in each gene. A CPC2 score below 0.5



404 defined a transcript as non-coding gene, whereas a CPC2 score  $\geq 0.5$  describes a transcript as  
405 protein-coding gene.

406

## 407 **(2) Ribosome profiling**

408 *T. brucei* ribosome profiling data (Vasquez et al., 2014) was re-analyzed using our merged  
409 genome annotation that consisted of the annotated protein-coding genes from TriTrypDB and  
410 our new annotated Ksplice noncoding genes (major isoforms). Quantification and statistical  
411 analysis were performed as described in Vasquez *et al.* (Vasquez et al., 2014). A *T. brucei*  
412 transcript was defined to be interacting productively with ribosomes if its translation efficacy  
413 score was  $\geq 1$  (translation efficacy = TE = RPKM of ribosome profiling / RPKM of RNA-seq).  
414 Inversely, A *T. brucei* transcript was defined to be not interacting with ribosomes if its  
415 translation efficacy score was  $\leq 0.2857$ , meaning its transcript levels (RNA-seq data in RPKM)  
416 was 3.5x higher than its level of association with *T. brucei* ribosomes. And a *T. brucei* transcript  
417 with TE score in between ( $0.2857 < TE < 1$ ) was defined to have low or few interaction with  
418 *T. brucei* ribosome. Additionally, as in Vasquez et al. (Vasquez et al., 2014), we investigated  
419 the 5' end periodicity of mapped reads of both coding and putative non-coding genes. For  
420 Figure supplement 6, for each gene, the number of reads mapping to each frame of translation  
421 (represented as +0, +1 and +2) was calculated, and the frame with the highest number of  
422 mapped reads was determined. A p-value indicating the likelihood of periodicity was  
423 calculated by a binomial test on the frame with the highest number of mapped reads under the  
424 null-hypothesis that this number should be equal to  $\frac{1}{3}$  of all reads mapped to that gene.

425

## 426 **(3) Proteomics**

427 The mass spectrometry proteomics data from Dejung et al. (Dejung et al., 2016) was analyzed  
428 following the author's methodology with some modifications using MaxQuant version 1.6.0.1  
429 (Cox and Mann, 2008) and searching against our Ksplice protein database. Our Ksplice protein  
430 database is composed by 3 set of proteins – protein-coding genes from TryTrypDB (version  
431 33, 10019 entries, excluding protein-coding genes with internal codon stop), putative proteins  
432 originated from the Ksplice new gene sequences (2003 Ksplice new genes + 72 Ksplice Kolev  
433 ncRNAs) and putative proteins originated from intergenic region sequences of *T. brucei*  
434 genome. Intergenic region sequences were selected to have on average the same size and  
435 number of sequences than Ksplice new genes. All Putative protein sequences (enclosed by a  
436 start and stop codon, with a minimum of 7 amino acids and a maximum of 4600 Da) originating  
437 from Ksplice new genes or intergenic regions of *T. brucei* genome were extracted in order of  
438 the DNA sequence and from the 3 possible translation frames (excluding sequences without  
439 start codon or/and containing ambiguous base). 14261 proteins were extracted from Ksplice  
440 new genes and 28750 proteins from the selected intergenic region of *T. brucei* genome.

441

#### 442 **Full length sequencing**

443 To investigate the presence of full length transcripts in our RNA-seq dataset, read pairs  
444 containing the SL sequence on the forward read and a poly-A tail on the reverse read were  
445 extracted and mapped to the *T. brucei* genome as described above (in identification of Ksplice  
446 putative new noncoding genes section). For all concordant alignments (both paired reads  
447 aligned), the boundaries of the transcripts were determined by the mapping positions of the two  
448 reads. Paired-end reads are providing the accurate boundaries of *T. brucei* transcripts as reads  
449 are sequenced from the same RNA molecule.

450

#### 451 **Differential expression of Ksplices new genes between BSF and PCF**

452 Differential expression analysis for Ksplice new genes between bloodstream and procyclic  
453 forms was performed using our merged annotation of *T. brucei* genome (major isoform of  
454 Ksplice new genes + Tritryp protein-coding genes) and the DEseq2 package. To that end, we  
455 used our previously published transcriptomic data (Rijo-Ferreira et al., 2017) containing 13  
456 RNA-seq samples replicate for both bloodstream and procyclic forms.

457

#### 458 **RIT-seq analysis of Ksplice new genes**

459 The RIT-seq data from Alsford *et al.* (Alsford et al., 2011) was re-analyzed by aligning the  
460 sequence reads against our merged annotation of *T. brucei* genome (major isoform of Ksplice  
461 new genes + Tritryp protein-coding genes). Quantification and statistical analysis were  
462 performed as described in Alsford *et al.* (Alsford et al., 2011).

463

#### 464 **Statistical analysis**

465 For all graphs in Figure 2C and Figure 3C-H: the results are shown as mean (SEM, n=3) and  
466 all statistical analyses are done with two-factor mixed ANOVA (two-sided). For graph in  
467 Figure 4A: the results are shown as mean (SEM, n=4) and statistical analyses are done with  
468 two-way ANOVA (two-sided). For graphs in Figure 4B and 4C: the results are shown as mean  
469 (SEM, n=4) and statistical analyses are done with Log-rank (Mantel-Cox) test.

470

#### 471 **Acknowledgment**

472

473 The authors would like to thank Marta Machado for her precious help with the *in vivo* mouse  
474 experiment of *T. brucei* infection. We also thank Helena Manso, Ana Rita Grosso and Nuno  
475 Barbosa Morais for their valuable help in computational analysis, and Marcia Triunfol for her  
476 assistance in preparing the manuscript.

477

## 478 **Authors' contributions**

479 FG, CN and LMF designed the study. FG, FB, DN, MS designed and performed the  
480 experiments. FG, DN and LMF analyzed the data and wrote the initial draft of the manuscript.  
481 FG and LMF supervised the project. All authors edited and approved the final manuscript.

## 482 483 **Competing interests**

484 The authors declare that they have no competing interests.

## 485 **Funding**

486 This work was supported in part by Fundação para a Ciência e Tecnologia (FCT)  
487 [PTDC/DTPEPI/7099/2014]; Howard Hughes Medical Institute International Early Career  
488 Scientist Program [55007419]. LMF is supported by FCT (IF/01050/2014 and CEEC  
489 institutional program). CN acknowledge the support of the Spanish Ministry of Economy,  
490 Industry and Competitiveness (MEIC) to the EMBL partnership, the Centro de Excelencia  
491 Severo Ochoa and the CERCA Programme / Generalitat de Catalunya.

## 492 493 **References**

- 494  
495 ABELSON JN, SIMON MI. 2009. METHODS IN ENZYMOLOGY, Academic Press Inc.,  
496 New York. doi:10.1016/S1554-4516(09)09011-5  
497 Alsford S, Turner DJ, Obado SO, Sanchez-Flores A, Glover L, Berriman M, Hertz-Fowler C,  
498 Horn D. 2011. High-throughput phenotyping using parallel sequencing of RNA  
499 interference targets in the African trypanosome. *Genome Res* **21**:915–924.  
500 doi:10.1101/gr.115089.110  
501 Amit-Avraham I, Pozner G, Eshar S, Fastman Y, Kolevzon N, Yavin E, Dzikowski R. 2015.  
502 Antisense long noncoding RNAs regulate var gene activation in the malaria parasite  
503 Plasmodium falciparum. *Proc Natl Acad Sci U S A* **112**:E982--E991.  
504 doi:10.1073/pnas.1420855112  
505 Aresta-Branco F, Pimenta S, Figueiredo LM. 2015. A transcription-independent epigenetic  
506 mechanism is associated with antigenic switching in *Trypanosoma brucei*. *Nucleic Acids*  
507 *Res* **44**:3131–3146. doi:10.1093/nar/gkv1459  
508 Aslett M, Aurrecochea C, Berriman M, Brestelli J, Brunk BP, Carrington M, Depledge DP,  
509 Fischer S, Gajria B, Gao X, Gardner MJ, Gingle A, Grant G, Harb OS, Heiges M, Hertz-  
510 Fowler C, Houston R, Innamorato F, Iodice J, Kissinger JC, Kraemer E, Li W, Logan  
511 FJ, Miller JA, Mitra S, Myler PJ, Nayak V, Pennington C, Phan I, Pinney DF,  
512 Ramasamy G, Rogers MB, Roos DS, Ross C, Sivam D, Smith DF, Srinivasamoorthy G,

- 513 Stoeckert CJ, Subramanian S, Thibodeau R, Tivey A, Treatman C, Velarde G, Wang H.  
514 2009. TriTrypDB: A functional genomic resource for the Trypanosomatidae. *Nucleic  
515 Acids Res* **38**:457–462. doi:10.1093/nar/gkp851
- 516 Audas TE, Jacob MD, Lee S. 2012. The nucleolar detention pathway: A cellular strategy for  
517 regulating molecular networks. *Cell Cycle* **11**:2059–2062. doi:10.4161/cc.20140
- 518 Barquilla A, Crespo JL, Navarro M. 2008. Rapamycin inhibits trypanosome cell growth by  
519 preventing TOR complex 2 formation. *Proc Natl Acad Sci* **105**:14579–14584.  
520 doi:10.1073/pnas.0802668105
- 521 Batram C, Jones NG, Janzen CJ, Markert SM, Engstler M. 2014. Expression site attenuation  
522 mechanistically links antigenic variation and development in *Trypanosoma brucei*. *Elife*  
523 **3**:1–18. doi:10.7554/elife.02324
- 524 Carlevaro-Fita J, Johnson R. 2019. Global Positioning System: Understanding Long  
525 Noncoding RNAs through Subcellular Localization. *Mol Cell* **73**:869–883.  
526 doi:10.1016/j.molcel.2019.02.008
- 527 Cox J, Mann M. 2008. MaxQuant enables high peptide identification rates, individualized  
528 p.p.b.-range mass accuracies and proteome-wide protein quantification. *Nat Biotechnol*  
529 **26**:1367–1372. doi:10.1038/nbt.1511
- 530 Dean S, Marchetti R, Kirk K, Matthews KR. 2009. A surface transporter family conveys the  
531 trypanosome differentiation signal. *Biochemistry* **459**:213–217.  
532 doi:10.1038/nature07997.A
- 533 Dejung M, Subota I, Bucerius F, Dindar G, Freiwald A, Engstler M, Boshart M, Butter F,  
534 Janzen CJ. 2016. Quantitative Proteomics Uncovers Novel Factors Involved in  
535 Developmental Differentiation of *Trypanosoma brucei*. *PLoS Pathog* **12**:1–20.  
536 doi:10.1371/journal.ppat.1005439
- 537 Engstler M, Boshart M. 2004. Cold shock and regulation of surface protein trafficking  
538 convey sensitization to inducers of stage differentiation in *Trypanosoma brucei*. *Genes  
539 Dev* **18**:2798–2811. doi:10.1101/gad.323404
- 540 Flynn RA, Chang HY. 2014. Long noncoding RNAs in cell-fate programming and  
541 reprogramming. *Cell Stem Cell* **14**:752–761. doi:10.1016/j.stem.2014.05.014
- 542 Geisler S, Coller J. 2013. RNA in unexpected places: long non-coding RNA functions in  
543 diverse cellular contexts. *Nat Rev Mol Cell Biol* **14**:699–712. doi:10.1038/nrm3679
- 544 Guizetti J, Barcons-Simon A, Scherf A. 2016. Trans-acting GC-rich non-coding RNA at var  
545 expression site modulates gene counting in malaria parasite. *Nucleic Acids Res* **44**:9710–  
546 9718. doi:10.1093/nar/gkw664
- 547 Kang YJ, Yang DC, Kong L, Hou M, Meng YQ, Wei L, Gao G. 2017. CPC2: A fast and  
548 accurate coding potential calculator based on sequence intrinsic features. *Nucleic Acids  
549 Res* **45**:W12–W16. doi:10.1093/nar/gkx428
- 550 Kelly S, Reed J, Kramer S, Ellis L, Webb H, Sunter J, Salje J, Marinsek N, Gull K,  
551 Wickstead B, Carrington M. 2007. Functional genomics in *Trypanosoma brucei*: A  
552 collection of vectors for the expression of tagged proteins from endogenous and ectopic  
553 gene loci. *Mol Biochem Parasitol* **154**:103–109. doi:10.1016/j.molbiopara.2007.03.012
- 554 Kielbasa SM, Wan R, Sato K, Frith MC, Horton P. 2011. Adaptive seeds tame genomic  
555 sequence comparison. *Genome Res* **21**:487–493. doi:10.1101/gr.113985.110
- 556 Kolev NG, Franklin JB, Carmi S, Shi H, Michaeli S, Tschudi C. 2010. The transcriptome of  
557 the human pathogen *Trypanosoma brucei* at single-nucleotide resolution. *PLoS Pathog*  
558 **6**:1–15. doi:10.1371/journal.ppat.1001090
- 559 Kretz M, Siprashvili Z, Chu C, Webster DE, Zehnder A, Qu K, Lee CS, Flockhart RJ, Groff  
560 AF, Chow J, Johnston D, Kim GE, Spitale RC, Flynn RA, Zheng GXY, Aiyer S, Raj A,  
561 Rinn JL, Chang HY, Khavari PA. 2013. Control of somatic tissue differentiation by the  
562 long non-coding RNA TINCR. *Nature* **493**:231–235. doi:10.1038/nature11661

- 563 Kretz M, Webster DE, Flockhart RJ, Lee CS, Zehnder A, Lopez-Pajares V, Qu K, Zheng  
564 GXY, Chow J, Kim GE, Rinn JL, Chang HY, Siprashvili Z, Khavari PA. 2012.  
565 Suppression of progenitor differentiation requires the long noncoding RNA ANCR.  
566 *Genes Dev* **26**:338–343. doi:10.1101/gad.182121.111
- 567 McDonald L, Cayla M, Ivens A, Mony B, MacGregor P, Silvester E, McWilliam K,  
568 Matthews KR. 2018. Non-linear hierarchy of the quorum sensing signalling pathway in  
569 bloodstream form African trypanosomes, PLOS Pathogens.  
570 doi:10.1371/journal.ppat.1007145
- 571 Menard KL, Haskins BE, Colombo AP, Denkers EY. 2018. Toxoplasma gondii Manipulates  
572 Expression of Host Long Noncoding RNA during Intracellular Infection. *Sci Rep* **8**:1–  
573 14. doi:10.1038/s41598-018-33274-5
- 574 Mony BM, MacGregor P, Ivens A, Rojas F, Cowton A, Young J, Horn D, Matthews K. 2014.  
575 Genome-wide dissection of the quorum sensing signalling pathway in Trypanosoma  
576 brucei. *Nature* **505**:681–685. doi:10.1038/nature12864
- 577 Mony BM, Matthews KR. 2015. Assembling the components of the quorum sensing pathway  
578 in African trypanosomes. *Mol Microbiol* **96**:220–232. doi:10.1111/mmi.12949
- 579 Ransohoff JD, Wei Y, Khavari PA. 2018. The functions and unique features of long  
580 intergenic non-coding RNA. *Nat Rev Mol Cell Biol* **19**:143–157.  
581 doi:10.1038/nrm.2017.104
- 582 Rijo-Ferreira F, Pinto-Neves D, Barbosa-Morais NL, Takahashi JS, Figueiredo LM. 2017.  
583 Trypanosoma brucei metabolism is under circadian control. *Nat Microbiol* **2**.  
584 doi:10.1038/nmicrobiol.2017.32
- 585 Rinn JL, Chang HY. 2012. Genome Regulation by Long Noncoding RNAs. *Annu Rev*  
586 *Biochem* **81**:145–166. doi:10.1146/annurev-biochem-051410-092902
- 587 Savić N, Bär D, Leone S, Frommel SC, Weber FA, Vollenweider E, Ferrari E, Ziegler U,  
588 Kaech A, Shakhova O, Cinelli P, Santoro R. 2014. LncRNA maturation to initiate  
589 heterochromatin formation in the nucleolus is required for exit from pluripotency in  
590 ESCs. *Cell Stem Cell* **15**:720–734. doi:10.1016/j.stem.2014.10.005
- 591 Silvester E, McWilliam K, Matthews K. 2017. The Cytological Events and Molecular  
592 Control of Life Cycle Development of Trypanosoma brucei in the Mammalian  
593 Bloodstream. *Pathogens* **6**:29. doi:10.3390/pathogens6030029
- 594 Trindade S, Rijo-Ferreira F, Carvalho T, Pinto-Neves D, Guegan F, Aresta-Branco F, Bento  
595 F, Young SA, Pinto A, Van Den Abbeele J, Ribeiro RM, Dias S, Smith TK, Figueiredo  
596 LM. 2016. Trypanosoma brucei Parasites Occupy and Functionally Adapt to the  
597 Adipose Tissue in Mice. *Cell Host Microbe* **19**:837–848.  
598 doi:10.1016/j.chom.2016.05.002
- 599 Vasquez JJ, Hon CC, Vanselow JT, Schlosser A, Siegel TN. 2014. Comparative ribosome  
600 profiling reveals extensive translational complexity in different Trypanosoma brucei life  
601 cycle stages. *Nucleic Acids Res* **42**:3623–3637. doi:10.1093/nar/gkt1386
- 602 Vassella E, Reuner B, Yutzy B, Boshart M. 1997. Differentiation of African trypanosomes is  
603 controlled by a density sensing mechanism which signals cell cycle arrest via the cAMP  
604 pathway. *J Cell Sci* **110**:2661–2671.
- 605 Yang X, Figueiredo LM, Espinal A, Okubo E, Li B. 2009. RAP1 Is Essential for Silencing  
606 Telomeric Variant Surface Glycoprotein Genes in Trypanosoma brucei. *Cell* **137**:99–  
607 109. doi:10.1016/j.cell.2009.01.037
- 608 Yao RW, Wang Y, Chen LL. 2019. Cellular functions of long noncoding RNAs. *Nat Cell*  
609 *Biol* **21**:542–551. doi:10.1038/s41556-019-0311-8
- 610 Zhang LF, Huynh KD, Lee JT. 2007. Perinucleolar Targeting of the Inactive X during S  
611 Phase: Evidence for a Role in the Maintenance of Silencing. *Cell* **129**:693–706.  
612 doi:10.1016/j.cell.2007.03.036

613 **Additional Files**

614

615 Table supplement 1 – 5

616 Figure supplement 1 – 9

617 References (22 - 33)

618

619 **Figures**

620

621



622

623 **Figure 1. Identification of 1,428 lncRNAs in *T. brucei*.**

624 (A) Pipeline used for the identification of lncRNAs genes in *T. brucei*. (1) Strand-specific and  
625 paired-end RNA-seq. (2) Ksplice identified putative genes whose transcripts contained a  
626 spliced-leader sequence (SL) and a poly(A) tail (PA) at the extremities. Ksplice used LAST  
627 (Kielbasa et al., 2011) to map RNA-seq reads to *T. brucei* genome. (3) The non-coding nature  
628 of the putative lncRNAs was predicted from a low CPC score, poor association with ribosomes,  
629 and no detectable peptides. *Grumpy* lncRNA is intergenic and immediately upstream of RBP7  
630 genes, previously shown to be involved in SIF-dependent pathway. (B) Subcellular localization  
631 of Ksplice long noncoding RNA genes in slender, stumpy, and procyclic forms of *T. brucei*,  
632 using RNA-FISH. (C) Number of Ksplice lncRNA genes that causes loss of parasite fitness  
633 upon downregulation by RNA interference (extracted from RIT-seq analysis (Alsford et al.,  
634 2011)). RNA interference was induced in bloodstream forms for 3 days (BSD3) — 278  
635 lncRNAs; in bloodstream forms for 6 days (BSD6) — 341 lncRNAs; during *in vitro* parasite  
636 differentiation from bloodstream to insect procyclic forms (DIF) — 400 lncRNAs; in procyclic  
637 forms, PF — 402 lncRNAs. The total number of lncRNA genes essential for parasite fitness in  
638 this screen was 649.

639



## A. Ksplice algorithm - lncRNA

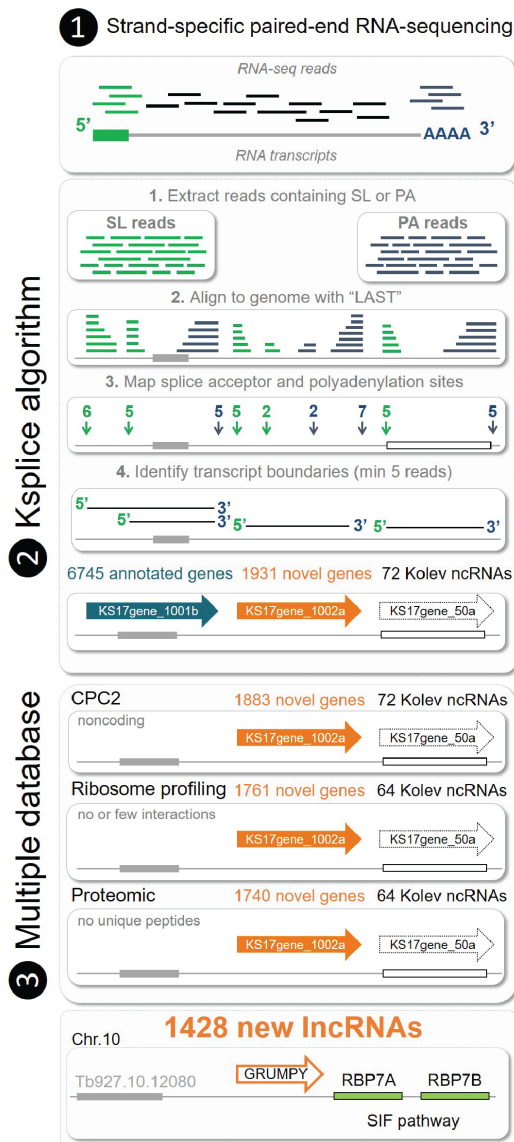

## B. RNA-FISH - lncRNA

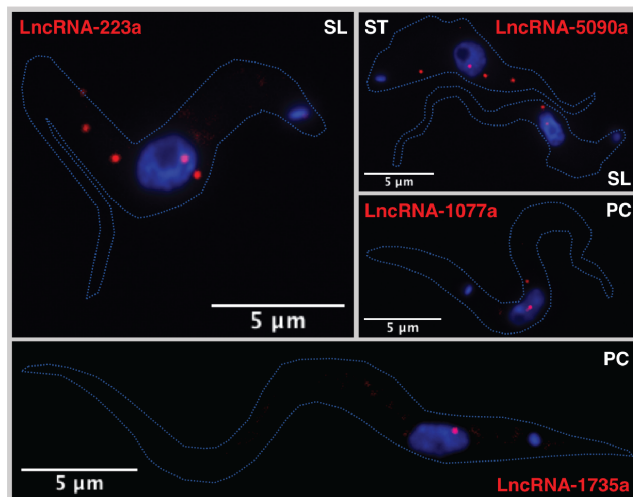

## C. Loss-of-function - lncRNA

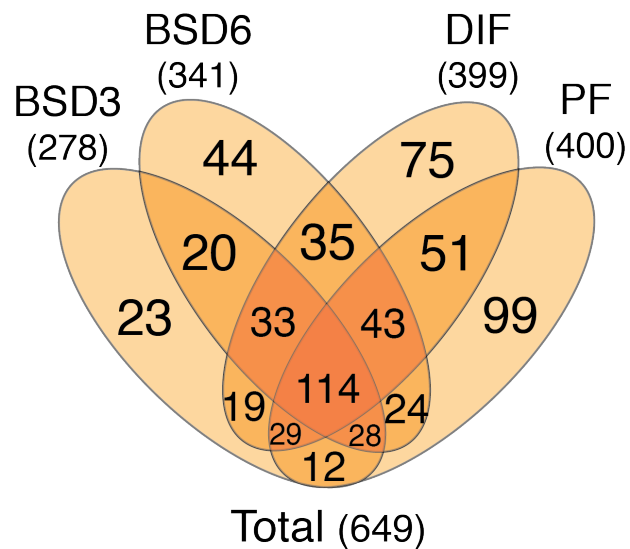

641 **Figure 2. Dynamic subnuclear localization of *grumpy* during parasite differentiation.**

642 (A) Ribosome association of *grumpy* and its neighboring genes was assessed by analyzing  
643 previously published ribosome profiling datasets: Mapping of RNA-seq reads from  
644 bloodstream forms (BSF-RNA) or procyclic forms (PF-RNA); mapping of ribosome profiling  
645 reads from bloodstream forms (BSF-RT) or procyclic forms (PF-RT). (B) Sequencing and  
646 accurate mapping of the 5' and 3' ends of the *grumpy* lncRNA using circular RT-PCR (cRT-  
647 PCR). Black outlined arrows show the position of splice acceptor site (SL) and polyadenylation  
648 sites (PA) identified with our Ksplice algorithm in the *grumpy* gene locus. Orange outlined  
649 arrows show the *grumpy* transcript isoforms that we sequenced using cRT-PCR and the number  
650 of clones sequenced for each isoform. (C) Transcript level changes during the transition from  
651 slender to stumpy forms, measured by qRT-PCR. Stumpy formation was induced by pCPT-  
652 cAMP (C3912 Sigma-Aldrich). Diff (Tb927.10.12970) is used as control to normalize  
653 transcript levels (Barquilla et al., 2008). PAD1 and GFP genes are used as controls to estimate  
654 parasite differentiation into stumpy forms. 10.10280 (Tb927.10.12080) is the gene upstream of  
655 *grumpy*. Results are shown as mean (SEM, n=3). Dunnett's multiple comparisons test is used  
656 for statistical analysis using the time point 0h as the control for comparison (Adjusted P value:  
657 \* <0,05 ; \*\* <0,01 ; \*\*\* <0,001). (D) Subcellular localization of *grumpy* during the transition  
658 from slender to stumpy forms using RNA-FISH. Time points (0h, 12h, 24h, 36h, 48) of parasite  
659 differentiation after addition of the pCPT-cAMP stimulus to the culture medium. DIC:  
660 Differential interference contrast microscopy image of *T. brucei*; GFP: GFP::PAD1 signal  
661 expressed in nucleus of stumpy forms; *GRUMPY*: *grumpy* signal using RNA-FISH (Stellaris  
662 probes).

663

### A. Ribosome profiling - Grumpy

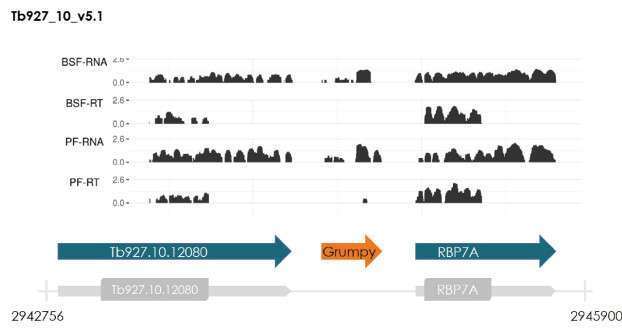

### C. Quantitative PCR - Grumpy

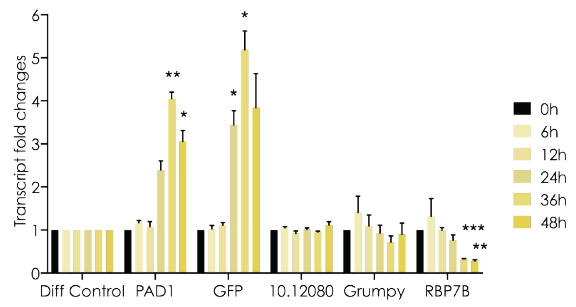

### B. cRT-PCR- Grumpy

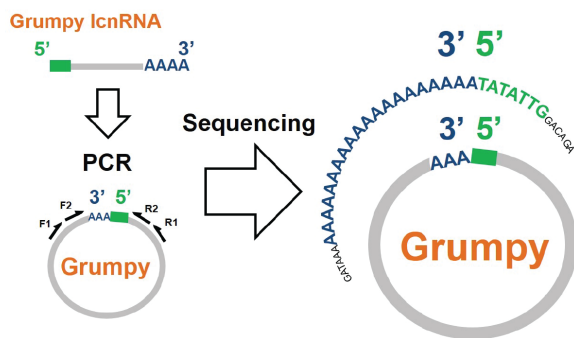

### Splice-acceptor and poly(A) sites - Grumpy

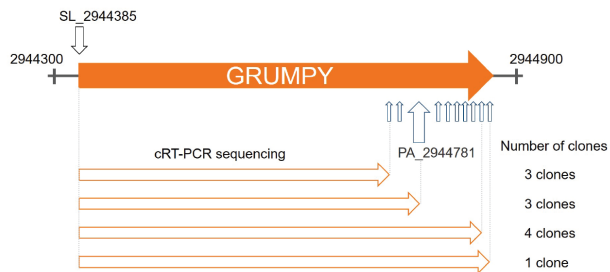

### D. RNA-FISH - Grumpy

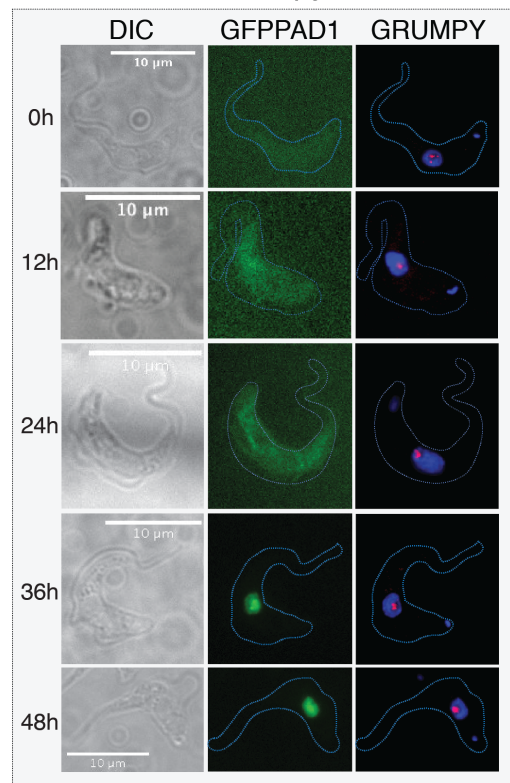

666 **Figure 3. *Grumpy* over-expression promotes premature parasite differentiation.**  
667 (A) Subcellular localization of *grumpy* after over-expression using RNA-FISH. Left-to-right:  
668 *GRUMPY*: *grumpy* signal using RNA-FISH; Phase contrast signal of *T. brucei* parasite ; GFP:  
669 GFP::PAD1 signal expressed in the nucleus of stumpy forms. (B) Transcript levels measured  
670 by qRT-PCR of *grumpy* and its neighbouring genes in parental cell line (black bars) and in  
671 *grumpy* over-expressing cell line (yellow bars). Changes of transcript levels were measured by  
672 normalizing transcript level to a control gene (Tb927.10.12970) and to the parental cell line.  
673 (C) Growth in parasites over-expressing *grumpy* (without passage) for 6 days. (D) Percentage  
674 of live cells measured by FACS of propidium iodide-stained cells after inducing *grumpy*  
675 overexpression. (E) Percentage of GFP::PAD1 positive parasites (stumpy forms) measured by  
676 FACS after inducing *grumpy* over-expression. (F) Percentage of parasites expressing both  
677 GFP::PAD1 and endogenous PAD1 protein are measured by microscopy and image  
678 quantification, after inducing *grumpy* over-expression. Microscopy picture (on the left) showed  
679 an example of parasite expressing both GFP::PAD1 in the nucleus (in green) and the  
680 endogenous PAD1 protein at the cell surface (in red). Parasite DNA stained with DAPI (in  
681 blue). (G) Cell cycle profile of parental cell line (slender forms) and *grumpy*-over-expressing  
682 parasites at day 3 and 4 of *in vitro* culture without passage. (H) Differentiation assay to  
683 separately follow the transition from slender to stumpy and stumpy to procyclic forms.  
684 Parasites were cultured for 2 days without passage, in the presence or absence of tetracyclin.  
685 GFP::PAD1 expression was measured by FACS to score the percentage of stumpy forms.  
686 Parasites were transferred to DTM medium containing cis-acconitate and placed for 12h at  
687 27°C. The percentage of procyclic forms was quantified by flow cytometry using procyclin  
688 antibody. Results from Panel B to H are shown as mean (SEM, n=3). Sidak's multiple  
689 comparisons test is used for statistical analysis using the parental cell line as the control for  
690 comparison (Adjusted P value: \* <0,05 ; \*\* <0,01 ; \*\*\* <0,001, \*\*\*\* <0,0001).  
691

### A. RNA-FISH - Grumpy-OE

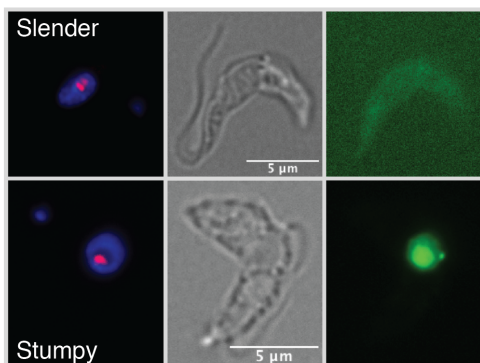

### B. Grumpy-OE

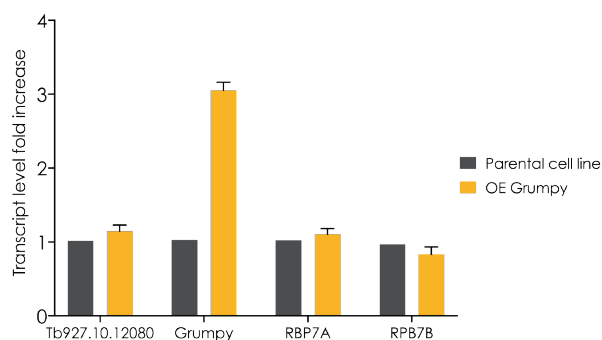

### C. Growth curve in vitro

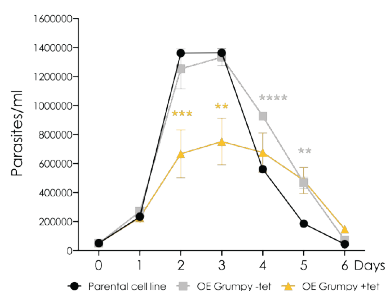

### D. Live cells in vitro

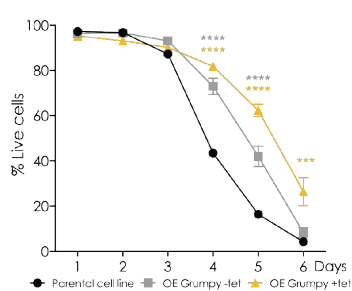

### E. Stumpy forms in vitro

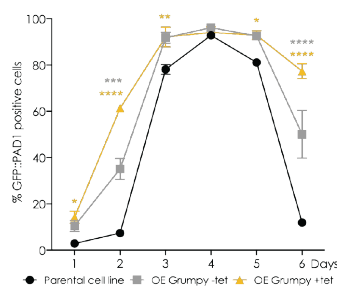

### F. PAD1 protein expression

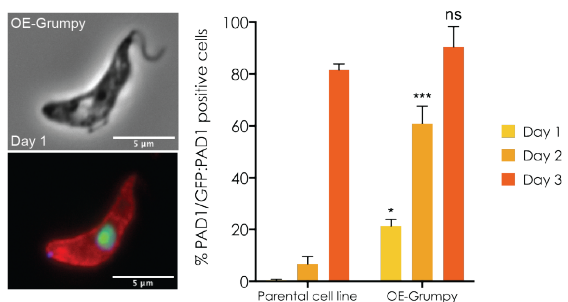

### G. Cell cycle profile

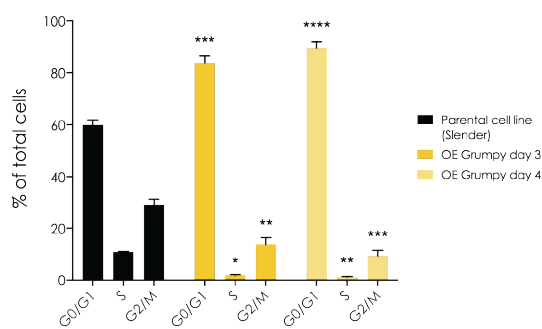

### H. Functional stumpy forms

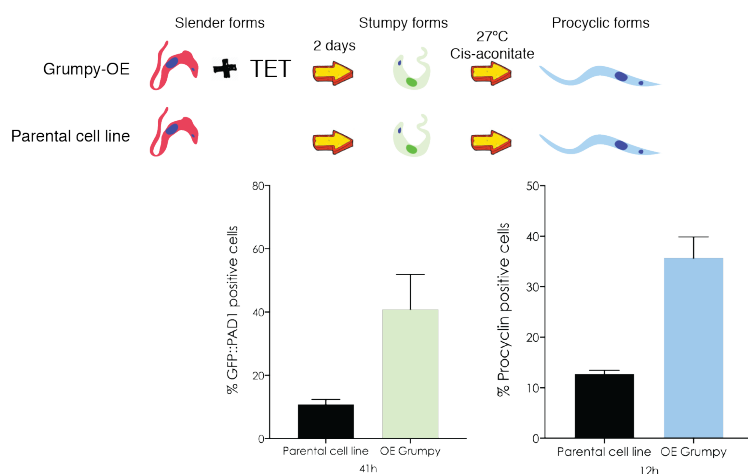

694 **Figure 4. Over-expression of *grumpy* promotes premature differentiation into stumpy**  
695 **forms *in vivo* and prolongs mouse survival.**

696 (A) Parasitemia in mice infected with the parental cell line (black line) or with a *grumpy*-over-  
697 expressing cell line. *Grumpy* over-expression was either not induced or induced by adding  
698 doxycycline to drinking water either at Day 0 (purple curve) or Day 4 (yellow curve) of  
699 infection. Results are shown as the mean (SEM, n=4). Dunnett's multiple comparisons test is  
700 used for statistical analysis using the parental cell line as the control (Adjusted P value: \*\*  
701 <0,01 ; \*\*\* <0,001). (B) Mice survival rates according to the type of infection described in  
702 panel A. Log rank (Mantel-Cox) test for comparisons of Kaplan-Meier survival curves  
703 indicates a significant increase in the survival rates in mice infected with *grumpy*-over-  
704 expressing cell-line parasites compared to mice infected with the parental cell line.  $\varphi$   $\varphi$ ,  
705  $p=0.0067$ .  $\varphi$ ,  $p=0.0177$ . (C) Fraction of mice with at least 20% of GFP::PAD1 positive  
706 parasites (=stumpy forms) in the blood as a function of the parasitemia. Log rank (Mantel-Cox)  
707 test for comparisons of Kaplan-Meier curves indicates a significant premature parasite  
708 differentiation into stumpy forms in mice infected with *grumpy*-overexpressing cell line  
709 parasites compared to mice infected with the parental cell line.  $\varphi$   $\varphi$ ,  $p=0.0067$ .  $\varphi$ ,  $p=0.0177$ .

710

### A. Parasitemia

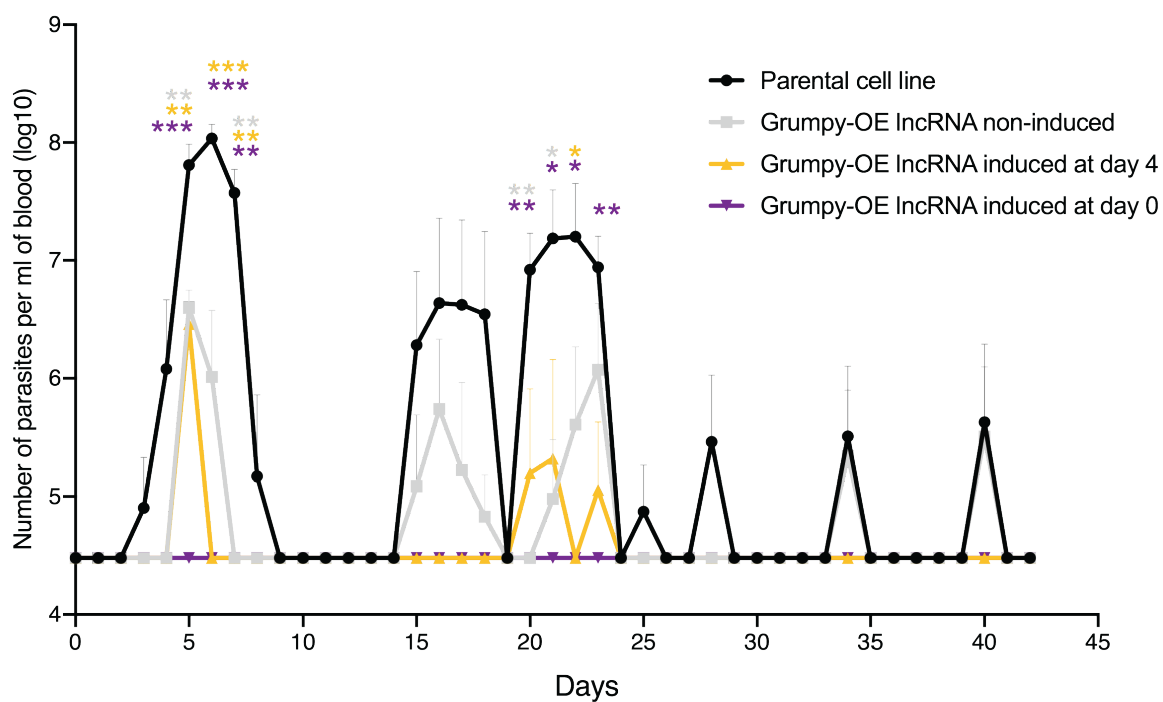

### B. Mouse survival

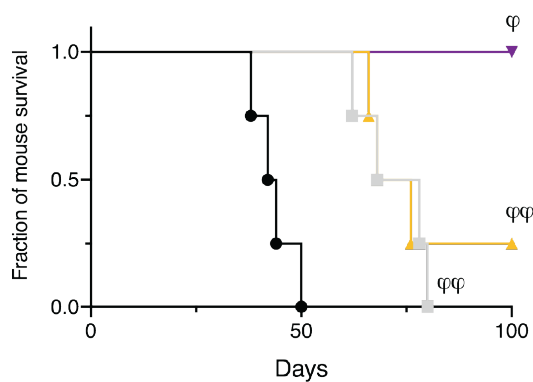

### C. Stumpy formation

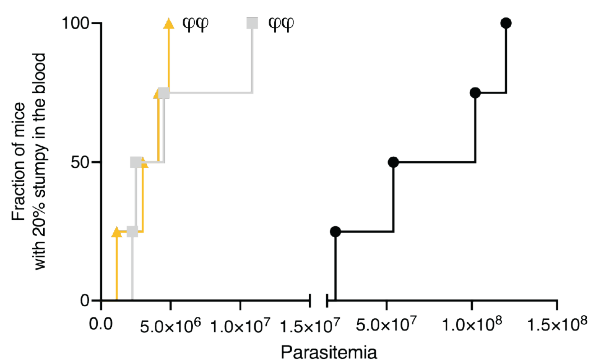

711  
712
